# Supplementary material for: Traditional Chinese Medicine Intervenes Ventricular Remodeling Following Acute Myocardial Infarction: Evidence From 40 Random Controlled Trials With 3,659 Subjects
Source: PubMed Central journal article supplement (PMC8438202; doi:10.3389/fphar.2021.707394), 2021-08-31
Supplement: Table1.pdf [file Table1.pdf]

Supplementary Table S1. Characteristics of the included studies

| Study              | Method            | Sample size and Age (Years)                          | Course of treatment | Intervention                                                                    | Outcomes                                                                             |
|--------------------|-------------------|------------------------------------------------------|---------------------|---------------------------------------------------------------------------------|--------------------------------------------------------------------------------------|
| Shuai Mao 2020     | RCT, non-blind    | T: 202, 68.61±8.48 Years<br>C: 201, 67.50±7.82 Years | 6 months            | T: Tongguan Capsules + standard treatment<br>C: standard treatment              | LVESVi, LVEDVi, LVEF; MACE; other clinical assessment indicators                     |
| Shuai Mao 2016     | RCT, double blind | T: 42, 67.54±8.39 Years<br>C: 41, 68.38±10.41 Years  | 3 months            | T: Danlou tablets + standard treatment<br>C: placebo + standard treatment       | LVEDVi, LVESVi, LVEF; MACE; safety assessment                                        |
| TANG Yao-ping 2004 | RCT, non-blind    | T: 30, 64 Years<br>C: 30, 65 Years                   | 3 months            | T: Xuefu Zhuyu oral liquid + standard treatment<br>C: standard treatment        | LDV, LSV, EF                                                                         |
| Chao Shengwu 2007  | RCT, non-blind    | T: 24, 58±18 Years<br>C: 22, 57±11 Years             | 6 weeks             | T: TSN (tanshinoneII A) injection + standard treatment<br>C: standard treatment | LEDVi, LESVi, LVEF, E/A                                                              |
| Chen Bojun 2006    | RCT, non-blind    | T: 35, 59.8 Years<br>C: 35, 60.3 Years               | 6 months            | T: Tongguan Capsules + standard treatment<br>C: standard treatment              | LVEDVi, LVESVi, E/A, LVEF                                                            |
| Deng Shaolin 2007  | RCT, non-blind    | T: 77, 61.5±12.8 Years<br>C: 74, 61.4±11.5 Years     | 4 weeks             | T: WenYangBuQi decoction + standard treatment<br>C: standard treatment          | 6min walk test; LVEF, EDV, ESV, ASL, PSL                                             |
| Dong Xiaorui 2006  | RCT, non-blind    | T: 30, 56±9.07 Years<br>C: 30, 57±10.7 Years         | 8 weeks             | T: Yiqihuoxue prescription+ standard treatment<br>C: standard treatment         | Effective rate; IVST, LVPW, LVDd, WMS; clinical symptoms                             |
| Du Lijian 2007     | RCT, non-blind    | T: 47, 59.8±10.4 Years<br>C: 43, 56.5±8.7 Years      | 6 weeks             | T: Qiangxinling + standard treatment<br>C: standard treatment                   | Effective rate; AngII, PIIINP, TGF-β1, SOD; LEDVi, LESVi, LVEF, WMSI                 |
| Du Wuxun 2008      | RCT, non-blind    | T: 46, 68.5±8.5 Years<br>C: 44, 69.5±3.5 Years       | 6 weeks             | T: Qishenyiqi Gutta Pill + standard treatment<br>C: standard treatment          | WBC, CRP; LVDd, LVEDV, LVESV, LVEF; TCMSS                                            |
| Fan Yanyan 2014    | RCT, non-blind    | T: 30, 64.5±12.52 Years<br>C: 30, 61.53±15.41 Years  | 6 weeks             | T: Shenzaoyangxintang+ standard treatment<br>C: standard treatment              | Effective rate; LVEDD, IVST, EF, WMSI; CRP                                           |
| Fan Yuan 2018      | RCT, non-blind    | T: 25, 69.52±5.55 Years<br>C: 25, 70.55±5.89 Years   | 3 months            | T: Xingengjiuni decoction + standard treatment<br>C: standard treatment         | Effective rate; LVEF, LVEDD, LVESD                                                   |
| Fang Keyun 2020    | RCT, non-blind    | T: 49, 58.08±5.81 Years<br>C: 49, 57.56±5.41 Years   | 2 weeks             | T: Yugeng Tongyu decoction + standard treatment<br>C: standard treatment        | Effective rate; LVEF, LVEDV, LVESV, LVEDD; miRNA-21, GDF-15                          |
| Feng Qimao 2006    | RCT, non-blind    | T: 20, 67.15±6.53 Years<br>C: 20, 66.15±6.70 Years   | 6 months            | T: Yiqihuoxue Recipe + standard treatment<br>C: standard treatment              | Effective rate; TCMSS, ATII, ALD, ET; LVEDVi, LVESVi, LvmassI, EF, E/A, WMI, WT      |
| Gong Jun 2017      | RCT, non-blind    | T: 45, 67.2±9.0 Years<br>C: 45, 66.5±10.1 Years      | 8 weeks             | T: Guanxin V Mixture + standard treatment<br>C: standard treatment              | NT-proBNP, hs-CRP, MMP-9, AngII, ET-1; LVEDD, LVESD, LVEF, LVESV, LVEDV, LVPWT, IVST |

|                      |                   |                                                      |          |                                                                                                     |                                                                                                 |
|----------------------|-------------------|------------------------------------------------------|----------|-----------------------------------------------------------------------------------------------------|-------------------------------------------------------------------------------------------------|
| Huang Xianglong 2018 | RCT, non-blind    | T: 65, 58.80±5.11 Years<br>C: 65, 59.67±4.86 Years   | 5 months | T: Buyang Huanwu decoction + standard treatment<br>C: standard treatment                            | Effective rate; LVDD, LVDS, LVPWT, LVM, LVESV, LVEDV, SV, CO, EF, E/A; TCMSS                    |
| Huang Xiaoping 2004  | RCT, double blind | T: 45, 60.2 Years<br>C: 45, 60.8 Years               | 8 weeks  | T: Yiqi Huoxue capsule + standard treatment<br>C: placebo + standard treatment                      | IVS, LVPW, LVDD, WMS, LVEF                                                                      |
| Jiang Ting 2020      | RCT, non-blind    | T: 29, 62.83±10.93 Years<br>C: 28, 60.40±10.38 Years | 2 months | T: Shenjie Granules+ standard treatment<br>C: standard treatment                                    | Effective rate; LVEF, LVEDD; NYHA; hs-CRP, NT-proBNP; cTnI, CK-MB; TCMSS                        |
| Jiang Xiaoxia 2017   | RCT, non-blind    | T: 48, 50.98±5.86 Years<br>C: 48, 51.27±6.27 Years   | 4 weeks  | T: Xuanbi Tongmai Decoction + Metoprolol + standard treatment<br>C: Metoprolol + standard treatment | Effective rate; TCMSS; LVEF, LVDEE, LVEDV, LVESV, SV, CI; NYHA; cTnI, Nt-proBNP                 |
| Li Bo 2018           | RCT, non-blind    | T: 20, 58.26±6.54 Years<br>C: 20, 59.87±7.54 Years   | 6 months | T: Shuxuetong injection + standard treatment<br>C: standard treatment                               | Effective rate; LVDD, LVDS, LVEF; other adverse events                                          |
| Li Jing 2017         | RCT, non-blind    | T: 30, 52.88±4.47 Years<br>C: 30, 53.76±4.63 Years   | 1 month  | T: Xuanbi Tongmai Decoction + Captopril + standard treatment<br>C: Captopril + standard treatment   | Effective rate; CI, SV, LVESV, LVEDD, LVEF, LVEDV                                               |
| Li Qihong 2014       | RCT, double blind | T: 46, 68.6±8.4 Years<br>C: 44, 69.3±3.6 Years       | 6 weeks  | T: Yiqi Huayu Capsule + standard treatment<br>C: placebo + standard treatment                       | Effective rate; WBC, CRP; LVDD, LVEDV, LVESV, LVEF                                              |
| Li Zheng 2007        | RCT, non-blind    | T: 45, 62±15 Years<br>C: 45, 61±14 Years             | 15 days  | T: Guanxinling injection + standard treatment<br>C: standard treatment                              | LVEF, FS, SV, CO, CI, E/A, LVEDD, LVESD, IVST, LVPWTD, LVEDV, LVESV; death results; MACE        |
| Lin Xiaoduan 2011    | RCT, non-blind    | T: 46, -<br>C: 44, -                                 | 6 weeks  | T: Compound Danshen Dripping Pill + standard treatment<br>C: standard treatment                     | WBC, CRP; LVDB, LVEDV, LVESV, LVEF; TCMSS                                                       |
| Liu Chunxiao 2016    | RCT, non-blind    | T: 40, 62.5±7.2 Years<br>C: 40, 63.1±6.9 Years       | 2 weeks  | T: Shuxuetong injection + standard treatment<br>C: standard treatment                               | Effective rate; TCMSS; EPFV, APFV, E/A, FS, LVEF, HR, CO, LVDD, LVED                            |
| Ruan Lei 2011        | RCT, non-blind    | T: 48, -<br>C: 47, -                                 | 6 months | T: Songling Xuemaikang + standard treatment<br>C: standard treatment                                | LVDEDV, LVEF; BNP                                                                               |
| Ruan Xiaofen 2012    | RCT, non-blind    | T: 28, -<br>C: 28, -                                 | 12 weeks | T: Kangxin Decoction + standard treatment<br>C: standard treatment                                  | LVDD, LVEF, IVST, LVPW; BNP                                                                     |
| Wang Yunping 2018    | RCT, non-blind    | T: 120, 58.3±2.6 Years<br>C: 120, 58.6±2.7 Years     | 1 month  | T: Shensong Yangxin capsule + standard treatment<br>C: standard treatment                           | Effective rate; LAD, EF, LVDD, LVDS, SV, FS; hs-CRP, NT-proBNP, IL-6, NLR; other adverse events |

|                                  |                   |                                                      |          |                                                                                                                |                                                                      |
|----------------------------------|-------------------|------------------------------------------------------|----------|----------------------------------------------------------------------------------------------------------------|----------------------------------------------------------------------|
| Wu Na 2017                       | RCT, non-blind    | T: 30, 59.21±9.81 Years<br>C: 30, 57.64±10.67 Years  | 6 months | T: Gualouxiebai Banxia Tang + standard treatment<br>C: standard treatment                                      | LAD, LVDd, LVDs, SV, Sm, FS, E/A, LVEDV, LVESV, LVSV, LVEF           |
| Xiang Zongxing 2019              | RCT, double blind | T: 60, 63.0±9.8 Years<br>C: 60, 64.2±11.3 Years      | 3 months | T: Danlou tablets + standard treatment<br>C: placebo + standard treatment                                      | TCMSS; LVEDVi, LVESVi, LVEF; MACE, other adverse events              |
| Xu Kai 2018                      | RCT, non-blind    | T: 70, 47±11 Years<br>C: 70, 48±9 Years              | 1 month  | T: Shenxiong Injection + Captopril + standard treatment<br>C: Captopril + standard treatment                   | BNP, LVEDD, LVEDV, LVESV, EF                                         |
| Xu Xiaojin 2019                  | RCT, non-blind    | T: 40, 56.85±6.71 Years<br>C: 40, 55.92±6.64 Years   | 6 months | T: Compound Danshen Dripping Pills + Rosuvastatin + standard treatment<br>C: Rosuvastatin + standard treatment | Effective rate; TCMSS; LVEDD, LVESD, LVEF, LVRI; MMP-9, TGF-β1, CTGF |
| Yang Guoliang 2014               | RCT, non-blind    | T: 53, -<br>C: 53, -                                 | 6 months | T: Heart-protecting musk pill + standard treatment<br>C: standard treatment                                    | LVEDVi, LVESVi, LVEF, LVMI, RWMI                                     |
| Yang Qi 2020                     | RCT, non-blind    | T: 34, 60.58±6.79 Years<br>C: 34, 60.88±8.41 Years   | 3 months | T: Gualou Xiebai Banxia decoction + standard treatment<br>C: standard treatment                                | NT-proBNP, TGF-β, TNF-α, IL-1, MMP-9; LVEF, LVEDV, LVESV             |
| Xu Wei 2012                      | RCT, non-blind    | T: 30, 64±11 Years<br>C: 29, 66±12 Years             | 3 months | T: Tongxinluo capsule + standard treatment<br>C: standard treatment                                            | LVEF, LVEDD, LVESD; PIIINP                                           |
| Zhang Jinguo 2002                | RCT, non-blind    | T: 54, 60.7±8.2 Years<br>C: 54, 61.6±9.1 Years       | 4 weeks  | T: Astragalus Injection + standard treatment<br>C: standard treatment                                          | LVEDVi, LVESVi, LVEF, ASL, PSL, PER, PFR, TPFR; MDA, CEC, SOD        |
| Zhang Jinguo, Gao Dongsheng 2002 | RCT, non-blind    | T: 46, 69.2 Years<br>C: 46, 68.9 Years               | 4 weeks  | T: Astragalus Injection + standard treatment<br>C: standard treatment                                          | LVEDVi, LVESVi, LVEF, ASL, PSL, PER, PFR, TPFR                       |
| Zhang Lin 2006                   | RCT, non-blind    | T: 32, -<br>C: 31, -                                 | 3 months | T: Yixintong capsule + standard treatment<br>C: standard treatment                                             | LVEDN, LVEF                                                          |
| Zhang Xuezheng 2008              | RCT, non-blind    | T: 36, 57.08±11.04 Years<br>C: 31, 58.74±11.24 Years | 6 months | T: Huixin capsule + standard treatment<br>C: standard treatment                                                | Effective rate; IVST, LVMI, LVEDV, LVEF; TC, TG, LDL-C, HDL-C        |
| Zhao Jing 2005                   | RCT, non-blind    | T: 27, 59.11±11.74 Years<br>C: 23, 63.13±8.29 Years  | 3 weeks  | T: Kaixin capsule + standard treatment<br>C: standard treatment                                                | LVDd, LVEDV, LVESV; AngII, ALD, ET                                   |
| Zhao Qingfeng 2008               | RCT, non-blind    | T: 21, 69.28±3.70 Years<br>C: 20, 68.80±2.58 Years   | 8 weeks  | T: Guanxin V Mixture + standard treatment<br>C: standard treatment                                             | Effective rate; TCMSS; BNP; LVEDD, LVESD, LVEF, LVE, LVA             |

Note: T, TCM group; C, Control group; RCT, randomized controlled trial.
