# Supplementary material for: Traditional Chinese Medicine Intervenes Ventricular Remodeling Following Acute Myocardial Infarction: Evidence From 40 Random Controlled Trials With 3,659 Subjects
Source: PubMed Central journal article supplement (PMC8438202; doi:10.3389/fphar.2021.707394), 2021-08-31
Supplement: Table2.pdf [file Table2.pdf]

Supplementary Table S2. Details of conventional Western medication

| Study      | detailed treatment of conventional Western medication                                                                                      |
|------------|--------------------------------------------------------------------------------------------------------------------------------------------|
| Mao 2020   | Not detailed                                                                                                                               |
| Mao 2016   | Not detailed                                                                                                                               |
| Tang 2004  | diazepam, aspirin, isosorbide dinitrate, captopril, bisoprolol                                                                             |
| Chao 2007  | low molecular heparin, aspirin, nitroglycerin, metoprolol, clopidogrel was added to patients who received PCI                              |
| Chen 2006  | thrombolytic therapy or PCI+ regular treatment (low molecular heparin, aspirin, nitroglycerin, metoprolol and other symptomatic treatment) |
| Deng 2007  | thrombolytic therapy, Isosorbide mononitrate, low molecular heparin, aspirin, fluvastatin, benazepril, metoprolol                          |
| Dong 2006  | thrombolytic therapy, antithrombins, antiplatelet agent, nitrates, $\beta$ -blocker, ACEI                                                  |
| Du 2007    | metoprolol, aspirin, verapamil, nitroglycerin                                                                                              |
| Du 2008    | Not detailed                                                                                                                               |
| Fan 2014   | aspirin, clopidogrel, low molecular heparin, atorvastatin, benazepril, metoprolol                                                          |
| Fan 2018   | clopidogrel, aspirin, $\beta$ -blocker, ACEI, statins, nitrates                                                                            |
| Fang 2020  | atorvastatin, aspirin                                                                                                                      |
| Feng 2006  | thrombolytic therapy, $\beta$ -blocker, diuretic, nitrates, antithrombins, analgesic, lipid-lowering medicine, anti-arrhythmia agent       |
| Gong 2017  | aspirin + low molecular heparin                                                                                                            |
| Huang 2018 | nitroglycerin, aspirin, atorvastatin                                                                                                       |
| Huang 2004 | thrombolytic therapy, low molecular heparin, aspirin, nitroglycerin, potassium magnesium aspartate, atorvastatin                           |
| Jiang 2020 | aspirin, ticagrelor, low molecular heparin, rosuvastatin, metoprolol, perindopril                                                          |
| Jiang 2017 | Heparin, thrombolytic therapy, polarized liquid, metoprolol                                                                                |
| Li 2018    | Not detailed                                                                                                                               |
| Li 2017    | nitrates, heparin, aspirin, statins, captopril                                                                                             |
| Li 2014    | aspirin, clopidogrel, low molecular heparin, nitroglycerin (or Isosorbide mononitrate), metoprolol, simvastatin, enalapril                 |
| Li 2007    | Not detailed                                                                                                                               |
| Lin 2011   | Not detailed                                                                                                                               |
| Liu 2016   | thrombolytic therapy, antithrombins, antiplatelet agent, $\beta$ -blocker, ACEI, CCB, digitalis preparation                                |
| Ruan 2011  | Not detailed                                                                                                                               |
| Ruan 2012  | heparin, aspirin, clopidogrel, nitrates, $\beta$ -blocker, ACEI, statins                                                                   |
| Wang 2018  | Not detailed                                                                                                                               |
| Wu 2017    | aspirin, atorvastatin, clopidogrel, metoprolol, ACEI                                                                                       |
| Xiang 2019 | PCI, anticoagulation                                                                                                                       |
| Xu 2018    | captopril, aspirin, low molecular heparin,                                                                                                 |
| Xu 2019    | aspirin, clopidogrel, $\beta$ -blocker, ACEI, ARB, rosuvastatin                                                                            |
| Yang 2014  | antithrombins, antiplatelet agent, ACEI, ARB, statins, $\beta$ -blocker, nitrates                                                          |
| Yang 2020  | aspirin, clopidogrel, atorvastatin, ACEI, ARB, $\beta$ -blocker                                                                            |
| Xu 2012    | Not detailed                                                                                                                               |

|                    |                                                                                                                                                                 |
|--------------------|-----------------------------------------------------------------------------------------------------------------------------------------------------------------|
| Zhang 2002         | nitrates, heparin, aspirin, polarized liquid                                                                                                                    |
| Zhang and Gao 2002 | nitrates, heparin, aspirin, polarized liquid                                                                                                                    |
| Zhang 2006         | Not detailed                                                                                                                                                    |
| Zhang 2008         | aspirin, clopidogrel, urokinase, amiodarone, nitroglycerin, polarized liquid, low molecular heparin, enalapril, simvastatin, Isosorbide mononitrate, metoprolol |
| Zhao 2005          | nitroglycerin, aspirin, metoprolol, captopril, lipid-lowering medicine                                                                                          |
| Zhao 2008          | ACEI, ARB, nitrates, heparin, aspirin, clopidogrel, $\beta$ -blocker, lipid-lowering medicine                                                                   |
