# Supplementary material for: Traditional Chinese Medicine Intervenes Ventricular Remodeling Following Acute Myocardial Infarction: Evidence From 40 Random Controlled Trials With 3,659 Subjects
Source: PubMed Central journal article supplement (PMC8438202; doi:10.3389/fphar.2021.707394), 2021-08-31
Supplement: Table3.pdf [file Table3.pdf]

Supplementary Table S3. Details of TCM

| Study              | TCM                     | Source (Y/N)                                       | Species, concentration                                                                                                                                                                                                                                                                                                                                                                                                                                     | Quality control reported (Y/N)                                                                      | Chemical analysis reported (Y/N) |
|--------------------|-------------------------|----------------------------------------------------|------------------------------------------------------------------------------------------------------------------------------------------------------------------------------------------------------------------------------------------------------------------------------------------------------------------------------------------------------------------------------------------------------------------------------------------------------------|-----------------------------------------------------------------------------------------------------|----------------------------------|
| Mao 2020           | Tongguan Capsules       | Y-Guangdong Provincial Hospital of TCM             | Radix and rhizome of <i>Salvia miltiorrhiza</i> Bge, Radix of <i>Astragalus membranaceus</i> Fisch. Bunge, Borneol (C <sub>10</sub> H <sub>18</sub> O) and Grasshopper                                                                                                                                                                                                                                                                                     | Y- tested by a Drug Safety Committee and approved for the clinical use by the Chinese Pharmacopoeia | Y-HPLC                           |
| Mao 2016           | Danlou tablets          | Y-Jilin Cornell Pharmaceutical Co., Ltd            | Radix and rhizome of <i>Salvia miltiorrhiza</i> Bge, <i>Ligusticum chuanxiong</i> , Root of <i>Trichosanthes kirilowii</i> Maxim., <i>Allium macrostemon</i> Bunge, <i>Paeonia lactiflora</i> Pall., Root of <i>Pueraria lobata</i> (Willd.) Ohwi, <i>Alisma plantago-aquatica</i> subsp. <i>orientale</i> (Sam.) Sam., <i>Curcuma phaeocaulis</i> Valetton, <i>Davallia mariesii</i> Moore ex Bak. , Radix of <i>Astragalus membranaceus</i> Fisch. Bunge | Y- Prepared according to Chinese Pharmacopoeia (2015 Edition), approval number: Z20050244           | Y-UPLC-MS/MS analysis            |
| TANG Yao-ping 2004 | Xuefu Zhuyu oral liquid | Y-Guangdong Zhanjiang Pharmaceutic General Factory | <i>Prunus persica</i> (L.) Batsch (12g), <i>Carthamus tinctorius</i> L. (9g), <i>Angelica sinensis</i> (Oliv.) Diels (9g), <i>Rehmannia chingii</i> H.L. Li (9g), <i>Achyranthes bidentata</i> Blume (9g), <i>Ligusticum chuanxiong</i> (5g), Root of <i>Platycodon grandiflorum</i> (Jacq.) A. DC. (5g), <i>Paeonia lactiflora</i> Pall. (6g), Fruit of <i>Citrus</i>                                                                                     | Y-Prepared according to "Guiding Principle of Clinical Study for New Drug (Chinese drug) in         | N                                |

|              |                                   |                                                 |                                                                                                                                                                                                                                                                                                                                                                                          |                                                                                                            |                |
|--------------|-----------------------------------|-------------------------------------------------|------------------------------------------------------------------------------------------------------------------------------------------------------------------------------------------------------------------------------------------------------------------------------------------------------------------------------------------------------------------------------------------|------------------------------------------------------------------------------------------------------------|----------------|
|              |                                   |                                                 | aurantium L. (6g), Glycyrrhiza uralensis Fisch. (3g), Root of Bupleurum scorzonerifolium Willd. (3g)                                                                                                                                                                                                                                                                                     | Treating Chest Bi"                                                                                         |                |
| Chao<br>2007 | TSN (tanshlnoneII A)<br>injection | N                                               | Extractive from Radix and rhizome of Salvia miltiorrhiza Bge                                                                                                                                                                                                                                                                                                                             | N                                                                                                          | tanshlnoneII A |
| Chen<br>2006 | Tongguan Capsules                 | Y-Guangdong<br>Hospital of TCM                  | Radix of Astragalus membranaceus Fisch. Bunge, Radix and rhizome of Salvia miltiorrhiza Bge., Borneol (C <sub>10</sub> H <sub>18</sub> O), Hirudo medicinalis                                                                                                                                                                                                                            | Y- Prepared according to Guangdong food and Drug Administration drug standards, approval number: Z03020045 | N              |
| Deng<br>2007 | WenYangBuQi<br>decoction          | Y-Guangzhou Yifang<br>Pharmaceutical<br>Factory | Aconitum carmichaelii Debeaux (6-10g), Ramulus Cinnamomi(6-15g), Panax ginseng C.A.Mey. (20g), Radix of Astragalus membranaceus Fisch. Bunge (20g), Ophiopogon japonicus (Thunb.) Ker Gawl. (15g), Schisandra chinensis (Turcz.) Baill. (8g), Paeonia lactiflora Pall. (20g), Allium macrostemon Bunge (15g), Trichosanthes kirilowii Maxim. (15g), Glycyrrhiza uralensis Fisch. (6-10g) | N                                                                                                          | N              |
| Dong<br>2006 | Yiqihuoxue<br>prescriptione       | Y-Henan Hospital of<br>TCM.                     | Radix of Astragalus membranaceus Fisch. Bunge, Panax ginseng C.A.Mey., Polygonatum sibiricum Delar. ex Redoute, Paeonia lactiflora Pall., arthamus tinctorius L.                                                                                                                                                                                                                         | N                                                                                                          | N              |
| Du<br>2007   | Qiangxinling                      | Y-Hebei Hospital of<br>TCM                      | Radix of Astragalus membranaceus Fisch. Bunge (30g), Radix and rhizome of Salvia miltiorrhiza Bge(15g), Hirudo medicinalis (8g), Root of Pueraria lobata (Willd.) Ohwi (12g), Ligusticum chuanxiong (8g), Paeonia lactiflora Pall. (15g), Angelica sinensis (Oliv.) Diels (20g), Root of Camellia sinensis O.Ktze.(15g)                                                                  | N                                                                                                          | N              |

|              |                            |                                                       |                                                                                                                                                                                                                                                                                                                                                                                                                                                                                 |                                                                                                          |   |
|--------------|----------------------------|-------------------------------------------------------|---------------------------------------------------------------------------------------------------------------------------------------------------------------------------------------------------------------------------------------------------------------------------------------------------------------------------------------------------------------------------------------------------------------------------------------------------------------------------------|----------------------------------------------------------------------------------------------------------|---|
| Du<br>2008   | Qishenyiqi Gutta Pill      | Y-Tianshili<br>Pharmaceutical<br>Group Co., Ltd       | Radix of Astragalus membranaceus Fisch. Bunge, Radix and rhizome of Salvia miltiorrhiza Bge., Dalbergia odorifera T. Chen, Panax pseudoginseng var. Notoginseng (Burkill) G. Hoo& C.L. Tseng                                                                                                                                                                                                                                                                                    | Y- Prepared according to SFDA national drug standards YBZ04332003-2008Z, SFDA approval number: Z20030139 | N |
| Fan<br>2014  | Shenzaoyangxintang         | Y-Maoming Hospital<br>of TCM in<br>Guangdong Province | Radix of Astragalus membranaceus Fisch. Bunge (20g), Codonopsis affinis Hook.f. & Thomson (20g), Ziziphus jujuba Mill. (20g), Ligusticum chuanxiong (15g), Angelica sinensis (Oliv.) Diels (20g), Ramulus Cinnamomi(10g), Glycyrrhiza uralensis Fisch. (10g), Ziziphus jujuba Mill. (15g), Seed of Platycladus orientalis(L.)Franco(15g), Schisandra chinensis (Turcz.) Baill. (10g), Polygala tenuifolia Willd.(Yuanzhi), Pinellia ternata (Thunb.) Breit. (15g)               | N                                                                                                        | N |
| Fan<br>2018  | Xingengjiuni decoction     | Y-Jiaozuo Hospital<br>of TCM                          | Os Draconis (30g), Cornus officinalis Siebold & Zucc. (18g), Talinum paniculatum (Jacq.) Gaertn. (15g), Allium macrostemon Bunge (6g), Angelica sinensis (Oliv.) Diels (18g), Concha Ostreae (30g), Aconitum carmichaelii Debeaux (15g), Dalbergia odorifera T. Chen (6g), Trichosanthes kirilowii Maxim. (12g), Carthamus tinctorius L. (6g)                                                                                                                                   | N                                                                                                        | N |
| Fang<br>2020 | Yugeng Tongyu<br>decoction | Y-Third People's<br>Hospital of Nanyang<br>City       | Panax ginseng C.A.Mey. (10-15g), Radix of Astragalus membranaceus Fisch. Bunge (15g), Radix and rhizome of Salvia miltiorrhiza Bge(15g)., Agastache rugosa (Fisch. et Mey.) O. Ktze. (10g), Angelica sinensis (Oliv.) Diels (10g), Corydalis yanhusuo (Y.H.Chou & Chun C.Hsu) W.T.Wang ex Z.Y.Su & C.Y.Wu(10g), Eupatorium fortunei Turcz.(10g), Ligusticum chuanxiong (10g),Citrus reticulata Blanco (10g) , Pinellia ternata (Thunb.) Breit. (10g),Rheum palmatum L . (6-10g) | N                                                                                                        | N |
| Feng<br>2006 | Yiqihuoxue Recipe          | Y-Shuguang<br>Hospital                                | Radix of Astragalus membranaceus Fisch. Bunge (30g), Pseudostellaria heterophyllaPax ex Pax et Hoffm. (15g), Panax pseudoginseng var.                                                                                                                                                                                                                                                                                                                                           | N                                                                                                        | N |

|               |                          |                                                            |                                                                                                                                                                                                                                                                                                                                                                                                                                                        |                                                                                                             |                 |
|---------------|--------------------------|------------------------------------------------------------|--------------------------------------------------------------------------------------------------------------------------------------------------------------------------------------------------------------------------------------------------------------------------------------------------------------------------------------------------------------------------------------------------------------------------------------------------------|-------------------------------------------------------------------------------------------------------------|-----------------|
|               |                          |                                                            | Notoginseng (Burkill) G. Hoo& C.L. Tseng (15g), Sparganium stoloniferum, Buch.-Ham. (15g), Curcuma phaeocaulis Valetton (15g), Prunus persica (L.) Batsch(9g), Carthamus tinctorius L. (9g), Lumbricus(20g), Cervus nippon Temminck(20g)                                                                                                                                                                                                               |                                                                                                             |                 |
| Gong<br>2017  | Guanxin V Mixture        | Y-Nanjing Hospital of TCM                                  | Radix and rhizome of Salvia miltiorrhiza Bge., Ligusticum chuanxiong, Carthamus tinctorius L., Paeonia lactiflora Pall., Dalbergia odorifera T. Chen                                                                                                                                                                                                                                                                                                   | Y- Prepared according to Drug administration of Jiangsu Province drug standards, approval number: Z04000781 | Y-UPLC analysis |
| Huang<br>2018 | Buyang Huanwu decoction  | Y-Zhongshan People's Hospital                              | Radix of Astragalus membranaceus Fisch. Bunge (25g), Radix and rhizome of Salvia miltiorrhiza Bge (8g), Carthamus tinctorius L. (8g), Prunus persica (L.) Batsch(8g), Angelica sinensis (Oliv.) Diels (10g), Ligusticum chuanxiong (10g), Lumbricus (6g), Paeonia lactiflora Pall. (15g), Root of Pueraria lobata (Willd.) Ohwi (12g)                                                                                                                  | N                                                                                                           | N               |
| Huang<br>2004 | Yiqi Huoxue capsule      | Y-First Affiliated Hospital of Guangzhou University of TCM | Radix of Astragalus membranaceus Fisch. Bunge, Codonopsis affinis Hook.f. & Thomson, Curcuma rchenyujin Y, H. Chenet C.Ling, Ligusticum chuanxiong, Panax pseudoginseng var. Notoginseng (Burkill) G. Hoo& C.L. Tseng, Atractylodes lancea( Thunb.)DC.                                                                                                                                                                                                 | N                                                                                                           | N               |
| Jiang<br>2020 | Shenjie Granules         | Y-Changzhou Hospital of TCM                                | Panax ginseng C.A.Mey., Daemonorops draco Bl., Paeonia lactiflora Pall., worm medicine                                                                                                                                                                                                                                                                                                                                                                 | N                                                                                                           | N               |
| Jiang<br>2017 | Xuanbi Tongmai Decoction | Y-Changzhou Hospital of TCM                                | Trichosanthes kirilowii Maxim. (20g), Radix of Astragalus membranaceus Fisch. Bunge (20g), Santalum album L. (20g), Allium macrostemon Bunge (15g), Poria cocos(Schw.)Wolf(15g), Luffa cylindrica (L.) Roem.(15g), Radix and rhizome of Salvia miltiorrhiza Bge(10g), Panax pseudoginseng var. Notoginseng (Burkill) G. Hoo& C.L. Tseng (10g), Pinellia ternata (Thunb.) Breit. (10g), Angelica sinensis (Oliv.) Diels (10g), Citrus reticulata Blanco | N                                                                                                           | N               |

|         |                          |                                            |                                                                                                                                                                                                                                                                                                                                                                                                                                                                                                                                                                                                                                                                           |                                                                                                          |                                |
|---------|--------------------------|--------------------------------------------|---------------------------------------------------------------------------------------------------------------------------------------------------------------------------------------------------------------------------------------------------------------------------------------------------------------------------------------------------------------------------------------------------------------------------------------------------------------------------------------------------------------------------------------------------------------------------------------------------------------------------------------------------------------------------|----------------------------------------------------------------------------------------------------------|--------------------------------|
|         |                          |                                            | (10g), <i>Corydalis yanhusuo</i> (Y.H.Chou & Chun C.Hsu) W.T.Wang ex Z.Y.Su & C.Y.Wu(6g), <i>Panax ginseng</i> C.A.Mey. (6g)                                                                                                                                                                                                                                                                                                                                                                                                                                                                                                                                              |                                                                                                          |                                |
| Li 2018 | Shuxuetong injection     | Y-Mudanjiang Youbo Pharmaceutical Co., Ltd | Extractive of <i>Hirudo medicinalis</i> (Shuizhi) and <i>Lumbricus</i>                                                                                                                                                                                                                                                                                                                                                                                                                                                                                                                                                                                                    | Y- Prepared according to SFDA national drug standards WS3-548(Z-084)-2005(Z), approval number: Z20030139 | Hirudin, lumbritin and plasmin |
| Li 2017 | Xuanbi Tongmai Decoction | Y-Yanji Hospital of TCM                    | <i>Trichosanthes kirilowii</i> Maxim. (25g), Radix and rhizome of <i>Salvia miltiorrhiza</i> Bge(20g), <i>Allium macrostemon</i> Bunge (15g), <i>Carthamus tinctorius</i> L. (10g), <i>Ligusticum chuanxiong</i> (15g), <i>Paeonia lactiflora</i> Pall. (15g), <i>Angelica sinensis</i> (Oliv.) Diels (15g), Root of <i>Aucklandia lappa</i> Decne. (15g), <i>Panax pseudoginseng</i> var. <i>Notoginseng</i> (Burkill) G. Hoo& C.L. Tseng (10g), <i>Panax ginseng</i> C.A.Mey. (8g), Radix of <i>Astragalus membranaceus</i> Fisch. Bunge (20g), <i>Poria cocos</i> (Schw.)Wolf(15g), <i>Corydalis yanhusuo</i> (Y.H.Chou & Chun C.Hsu) W.T.Wang ex Z.Y.Su & C.Y.Wu(10g) | N                                                                                                        | N                              |
| Li 2014 | Yiqi Huayu Capsule       | Y-Tangshan Hospital of TCM                 | Radix of <i>Astragalus membranaceus</i> Fisch. Bunge (60g), <i>Pseudostellaria heterophylla</i> Pax ex Pax et Hoffm. (30g), <i>Ligusticum chuanxiong</i> (15g) <i>Lumbricus</i> (10g), <i>Paeonia lactiflora</i> Pall. (10g), <i>Spatholobus suberectus</i> Dunn (30g)                                                                                                                                                                                                                                                                                                                                                                                                    | Y- Prepared according to Drug administration of Hebei Province drug standards, approval number 20050835  | N                              |
| Li 2007 | Guanxinning injection    | Y-Shenwei Pharmaceutical Group Co., Ltd    | <i>Ligusticum chuanxiong</i> , Radix and rhizome of <i>Salvia miltiorrhiza</i> Bge.                                                                                                                                                                                                                                                                                                                                                                                                                                                                                                                                                                                       | Y- Prepared according to SFDA national drug standards WS3-B-3267-98-2012, approval number: Z13020779     | N                              |
| Lin     | Compound Danshen         | Y-Tianshili                                | Radix and rhizome of <i>Salvia miltiorrhiza</i> Bge., <i>Panax pseudoginseng</i> var.                                                                                                                                                                                                                                                                                                                                                                                                                                                                                                                                                                                     | Y- Prepared according to                                                                                 | N                              |

|            |                          |                                                                           |                                                                                                                                                                                                                                                                                                                                                                            |                                                                                                          |                                |
|------------|--------------------------|---------------------------------------------------------------------------|----------------------------------------------------------------------------------------------------------------------------------------------------------------------------------------------------------------------------------------------------------------------------------------------------------------------------------------------------------------------------|----------------------------------------------------------------------------------------------------------|--------------------------------|
| 2011       | Dripping Pill            | Pharmaceutical Group Co., Ltd                                             | Notoginseng (Burkill) G. Hoo& C.L. Tseng, Borneol (C10H18O)                                                                                                                                                                                                                                                                                                                | Chinese Pharmacopoeia (2015 Edition), approval number: Z10950111                                         |                                |
| Liu 2016   | Shuxuetong injection     | Y-Mudanjiang Youbo Pharmaceutical Co., Ltd                                | Extractive of Hirudo medicinalis and Lumbricus                                                                                                                                                                                                                                                                                                                             | Y- Prepared according to SFDA national drug standards WS3-548(Z-084)-2005(Z), approval number: Z20010100 | Hirudin, lumbritin and plasmin |
| Ruan 2011  | Songling Xuemaikang      | Y-Chengdu Kanghong Pharmaceutical Co., Ltd                                | Root of Pueraria lobata (Willd.) Ohwi, Pinus armandi Franch, Pernulo                                                                                                                                                                                                                                                                                                       | Y- Prepared according to Chinese Pharmacopoeia (2015 Edition), approval number: Z10960023                | N                              |
| Ruan 2012  | Kangxin Decoction        | Y-Shuguang Hospital                                                       | Panax ginseng C.A.Mey., Typha angustifolia L., Radix and rhizome of Salvia miltiorrhiza Bge., Trichosanthes kirilowii Maxim.                                                                                                                                                                                                                                               | N                                                                                                        | N                              |
| Wang 2018  | Shensong Yangxin capsule | Y-Beijing Yiling Pharmaceutical Co., Ltd                                  | Panax ginseng C.A.Mey., Nardostachys jatamansi DC., Ophiopogon japonicus (Thunb.) Ker Gawl., Schisandra chinensis (Turcz.) Baill., Radix and rhizome of Salvia miltiorrhiza Bge., Coptis chinensis Franch., Cornus officinalis Siebold & Zucc., Ziziphus jujuba Mill., Cichlanthus chinensis (DC.) Tiegh., Paeonia lactiflora Pall., Eupolyphaga seusteophage, Os Draconis | Y- Prepared according to Chinese Pharmacopoeia (2015 Edition), approval number: Z20103032                | N                              |
| Wu 2017    | Gualouxiebai Banxia Tang | Y-Jiangsu Hospital of integrated traditional Chinese and Western Medicine | Fruit of Trichosanthes kirilowii Maxim. (24g), Allium macrostemon Bunge (9g), Pinellia ternata (Thunb.) Breit.(12g), Chinese Baijiu (80ml)                                                                                                                                                                                                                                 | N                                                                                                        | N                              |
| Xiang 2019 | Danlou tablets           | Y-Jilin Cornell Pharmaceutical Co.,                                       | Trichosanthes kirilowii Maxim., Allium macrostemon Bunge, Root of Pueraria lobata (Willd.) Ohwi, Ligusticum chuanxiong, Radix and rhizome of Salvia                                                                                                                                                                                                                        | Y- Prepared according to Chinese Pharmacopoeia                                                           | N                              |

|            |                                 |                                                   |                                                                                                                                                                                                                                                                                                                          |                                                                                                                     |                                       |
|------------|---------------------------------|---------------------------------------------------|--------------------------------------------------------------------------------------------------------------------------------------------------------------------------------------------------------------------------------------------------------------------------------------------------------------------------|---------------------------------------------------------------------------------------------------------------------|---------------------------------------|
|            |                                 | Ltd                                               | multiorrhiza Bge., Paeonia lactiflora Pall., Alisma plantago-aquatica subsp. orientale (Sam.) Sam., Radix of Astragalus membranaceus Fisch. Bunge, Curcuma rchenyujin Y, H. Chenet C.Ling, Davallia mariesii Moore ex Bak.                                                                                               | (2015 Edition), approval number: Z20050244                                                                          |                                       |
| Xu 2018    | Shenxiong Injection             | Y-Guizhou Yibai injection Pharmaceutical Co., Ltd | Extractive of Radix and rhizome of Salvia multiorrhiza Bge. And Ligusticum chuanxiong                                                                                                                                                                                                                                    | Y- Prepared according to SFDA national drug standards WS-10001-(HD-1136)-2002-2012-2017, approval number: H52020703 | Danshensu, Ligustrazine hydrochloride |
| Xu 2019    | Compound Danshen Dripping Pills | Y-Tianshili Pharmaceutical Group Co., Ltd         | Radix and rhizome of Salvia multiorrhiza Bge., Panax pseudoginseng var. Notoginseng (Burkill) G. Hoo& C.L. Tseng, Borneol (C10H18O)                                                                                                                                                                                      | Y- Prepared according to Chinese Pharmacopoeia (2015 Edition), approval number: Z10950111                           | N                                     |
| Yang 2014  | Heart-protecting musk pill      | Y-Shanghai Hehuang Pharmaceutical Co., Ltd        | Moschus (Shexiang), Panax ginseng C.A.Mey., Bos taurus domesticus Gmelin, Cinnamomum cassia (L.) J.Presl, Liquidambar orientalis Mill., Bufo gargarizans Cantor, Borneol (C10H18O)                                                                                                                                       | Y- Prepared according to Chinese Pharmacopoeia (2015 Edition), approval number: Z31020068                           | N                                     |
| Yang 2020  | Gualou Xiebai Banxia decoction  | Y-Shaoxing People's Hospital                      | Trichosanthes kirilowii Maxim. (12g), Allium macrostemon Bunge (9g), Pinellia ternata (Thunb.) Breit.(9g), Huangjiu(appropriate amount)                                                                                                                                                                                  | N                                                                                                                   | N                                     |
| Xu 2012    | Tongxinluo capsule              | Y-Shijiazhuang Yiling Pharmaceutical Co., Ltd     | Panax ginseng C.A.Mey., Hirudo medicinalis, Buthus martensii Karsch, Paeonia lactiflora Pall., Periostracum cicadae, Eupolyphaga seusteleophaga, Scolopendra subspinipes, Santalum album L., Dalbergia odorifera T. Chen, resin of Boswellia carterii Birdw. [B. sacra Fluek.], Ziziphus jujuba Mill., Borneol (C10H18O) | Y- Prepared according to Chinese Pharmacopoeia (2015 Edition), approval number: Z19980015                           | N                                     |
| Zhang 2002 | Astragalus Injection            | Y-Chengdu Dior Jiahong                            | Radix of Astragalus membranaceus Fisch. Bunge                                                                                                                                                                                                                                                                            | Y- Prepared according to SFDA national drug                                                                         | N                                     |

|                          |                      |                                                                     |                                                                                                                                                                                                                                                                                                                                                                                                                            |                                                                                                                           |                    |
|--------------------------|----------------------|---------------------------------------------------------------------|----------------------------------------------------------------------------------------------------------------------------------------------------------------------------------------------------------------------------------------------------------------------------------------------------------------------------------------------------------------------------------------------------------------------------|---------------------------------------------------------------------------------------------------------------------------|--------------------|
|                          |                      | Pharmaceutical<br>Factory                                           |                                                                                                                                                                                                                                                                                                                                                                                                                            | standards 2001ZFB0171,<br>approval number:<br>Z51021776                                                                   |                    |
| Zhang<br>and Gao<br>2002 | Astragalus Injection | Y-Chengdu Dior<br>Jiuhong<br>Pharmaceutical<br>Factory              | Radix of Astragalus membranaceus Fisch. Bunge                                                                                                                                                                                                                                                                                                                                                                              | Y- Prepared according to<br>SFDA national drug<br>standards 2001ZFB0171,<br>approval number:<br>Z51021776                 | N                  |
| Zhang<br>2006            | Yixintong capsule    | Y-Taian Hospital of<br>TCM                                          | Radix of Astragalus membranaceus Fisch. Bunge, Panax ginseng C.A.Mey.,<br>Radix and rhizome of Salvia miltiorrhiza Bge ., Panax pseudoginseng var.<br>Notoginseng (Burkill) G. Hoo& C.L. Tseng, Lumbricus(Dilong), Hirudo<br>medicinalis, Root of Pueraria lobata (Willd.) Ohwi                                                                                                                                            | N                                                                                                                         | N                  |
| Zhang<br>2008            | Huixin capsule       | Y-Shandong<br>University of TCM                                     | Radix and rhizome of Salvia miltiorrhiza Bge(30g)., Radix of Astragalus<br>membranaceus Fisch. Bunge (20g), Carthamus tinctorius L. (15g), Prunus<br>persica (L.) Batsch(10g), Panax pseudoginseng var. Notoginseng (Burkill) G.<br>Hoo& C.L. Tseng (10g), Angelica sinensis (Oliv.) Diels (15g), Ligusticum<br>chuanxiong (15g), Hirudo medicinalis (10g), Trichosanthes kirilowii Maxim.<br>(30g), Ramulus Cinnamomi(6g) | Y- Prepared according to<br>Drug administration of<br>Shandong Province drug<br>standards, approval number<br>Z0720030114 | N                  |
| Zhao<br>2005             | Kaixin capsule       | Y-First Affiliated<br>Hospital of<br>Guangzhou<br>University of TCM | Panax quiquefolium L., Radix Astragali, Ophiopogon japonicus (Thunb.) Ker<br>Gawl., Typha angustifolia L. (Puhuang), Ligusticum chuanxiong, Crataegus<br>pinnatifida Bunge, Semen sinapis, Fritillaria thunbergii, Gardenia jasminoides<br>J.Ellis                                                                                                                                                                         | N                                                                                                                         | N                  |
| Zhao<br>2008             | Guanxin V            | Y-Nanjing Hospital<br>of TCM                                        | Codonopsis affinis Hook.f. & Thomson, Ophiopogon japonicus (Thunb.) Ker<br>Gawl., Schisandra chinensis (Turcz.) Baill., Rehmannia chingii H.L. Li, Salvia<br>miltiorrhiza Bge., Paeonia lactiflora Pall.                                                                                                                                                                                                                   | Y- Prepared according to<br>Drug administration of<br>Jiangsu Province drug<br>standards, approval                        | Y-UPLC<br>analysis |



|  |  |  |  |                   |  |
|--|--|--|--|-------------------|--|
|  |  |  |  | number: Z04000781 |  |
|--|--|--|--|-------------------|--|

SFDA: State Food and Drug Administration, TCM: traditional Chinese medicine
