# Supplementary material for: Traditional Chinese Medicine Intervenes Ventricular Remodeling Following Acute Myocardial Infarction: Evidence From 40 Random Controlled Trials With 3,659 Subjects
Source: PubMed Central journal article supplement (PMC8438202; doi:10.3389/fphar.2021.707394), 2021-08-31
Supplement: Table4.pdf [file Table4.pdf]

Supplementary Table S4. The results of intervention duration subgroup analysis

| Variable      | No. of Trials | No. of T | No. of C | SMD (95% CI)            | $I^2$ (%) | $P$       |
|---------------|---------------|----------|----------|-------------------------|-----------|-----------|
| Effectiveness |               |          |          |                         |           |           |
| 2w            | 2             | 89       | 89       | 3.97 [1.39, 11.32]      | 0         | 0.01      |
| 4w            | 3             | 198      | 198      | 6.12 [2.03, 18.50]      | 55        | 0.001     |
| 6w            | 3             | 123      | 117      | 3.18 [1.69, 5.95]       | 0         | 0.0003    |
| 8w            | 3             | 80       | 78       | 3.32 [1.46, 7.53]       | 0         | 0.004     |
| 12w           | 1             | 25       | 25       | 11.29 [1.29, 98.89]     | NA        | 0.03      |
| 20w           | 1             | 65       | 65       | 3.60 [1.22, 10.60]      | NA        | 0.02      |
| 24w           | 4             | 116      | 111      | 5.22 [1.65, 16.59]      | 0         | 0.005     |
| TCMSS         |               |          |          |                         |           |           |
| 6w            | 2             | 92       | 88       | -3.47 [-4.88, -2.06]    | 0         | < 0.00001 |
| 8w            | 2             | 50       | 48       | -3.25 [-4.97, -1.52]    | 0         | 0.0002    |
| 12w           | 1             | 60       | 60       | -1.10 [-1.78, -0.42]    | NA        | 0.002     |
| 20w           | 1             | 65       | 65       | -5.04 [-6.38, -3.70]    | NA        | < 0.00001 |
| 24w           | 2             | 60       | 60       | -3.28 [-6.07, -0.49]    | 82        | 0.02      |
| LVEDD         |               |          |          |                         |           |           |
| 2w            | 2             | 76       | 74       | -4.59 [-5.33, -3.86]    | 0         | < 0.00001 |
| 3w            | 1             | 27       | 23       | -2.10 [-4.23, 0.03]     | NA        | 0.05      |
| 4w            | 4             | 191      | 188      | -3.59 [-6.38, -0.80]    | 96        | 0.01      |
| 6w            | 3             | 95       | 94       | -6.17 [-12.71, 0.36]    | 96        | 0.06      |
| 8w            | 5             | 192      | 191      | -2.16 [-2.99, -1.32]    | 2         | < 0.00001 |
| 12w           | 4             | 260      | 260      | 0.72 [-3.62, 5.06]      | 96        | 0.74      |
| 16w           | 1             | 70       | 70       | 0.00 [-0.84, 0.84]      | NA        | 1.00      |
| 20w           | 1             | 30       | 30       | -3.90 [-5.71, -2.09]    | NA        | < 0.00001 |
| 24w           | 3             | 88       | 88       | -2.40 [-4.30, -0.51]    | 4         | 0.01      |
| LVESD         |               |          |          |                         |           |           |
| 2w            | 2             | 70       | 69       | -3.66 [-5.97, -1.36]    | 76        | 0.002     |
| 4w            | 1             | 40       | 40       | -2.70 [-5.94, 0.54]     | NA        | 0.1       |
| 8w            | 3             | 150      | 150      | -2.11 [-4.67, 0.45]     | 86        | 0.11      |
| 12w           | 3             | 100      | 100      | -2.24 [-8.26, 3.77]     | 95        | 0.46      |
| 24w           | 2             | 51       | 50       | 1.57 [-5.44, 8.58]      | 90        | 0.66      |
| LVEDV         |               |          |          |                         |           |           |
| 2w            | 2             | 94       | 94       | -17.08 [-22.77, -11.38] | 0         | < 0.00001 |
| 3w            | 1             | 27       | 23       | -2.20 [-8.84, 4.44]     | NA        | 0.52      |
| 4w            | 3             | 148      | 148      | -2.57 [-20.78, 15.65]   | 98        | 0.78      |
| 6w            | 3             | 138      | 132      | -7.89 [-13.21, -2.57]   | 0         | 0.004     |
| 8w            | 1             | 45       | 45       | 0.00 [-3.68, 3.68]      | NA        | 1.00      |
| 12w           | 1             | 34       | 34       | -10.61 [-17.44, -3.78]  | NA        | 0.002     |
| 20w           | 1             | 65       | 65       | -11.70 [-20.77, -2.63]  | NA        | 0.01      |
| 24w           | 3             | 114      | 108      | -14.73 [-34.50, 5.04]   | 89        | 0.14      |
| LVESV         |               |          |          |                         |           |           |
| 2w            | 2             | 94       | 94       | -16.94 [-28.28, -5.59]  | 87        | 0.003     |
| 3w            | 1             | 27       | 23       | -3.10 [-8.68, 2.48]     | NA        | 0.28      |

|        |   |     |     |                       |    |           |
|--------|---|-----|-----|-----------------------|----|-----------|
| 4w     | 3 | 148 | 148 | -1.71 [-10.98, 7.56]  | 97 | 0.72      |
| 6w     | 3 | 138 | 132 | -9.70 [-12.24, -7.16] | 0  | < 0.00001 |
| 8w     | 1 | 45  | 45  | 0.00 [-1.78, 1.78]    | NA | 1.00      |
| 12w    | 1 | 34  | 34  | -4.39 [-6.34, -2.44]  | NA | < 0.00001 |
| 20w    | 1 | 65  | 65  | -3.05 [-4.31, -1.79]  | NA | < 0.00001 |
| 24w    | 1 | 30  | 30  | -6.02 [-16.34, 4.30]  | NA | 0.25      |
| LVEDVi |   |     |     |                       |    |           |
| 4w     | 2 | 100 | 100 | -4.30 [-7.33, -1.27]  | 0  | 0.005     |
| 6w     | 2 | 71  | 65  | 0.37 [-2.69, 3.42]    | 87 | 0.81      |
| 12w    | 3 | 132 | 131 | -6.53 [-7.54, -5.52]  | 22 | < 0.00001 |
| 24w    | 4 | 310 | 309 | -3.90 [-5.06, -2.74]  | 94 | < 0.00001 |
| LVESVi |   |     |     |                       |    |           |
| 4w     | 2 | 100 | 100 | -2.66 [-4.60, -0.72]  | 0  | 0.007     |
| 6w     | 2 | 71  | 65  | -3.17 [-12.58, 6.23]  | 94 | 0.51      |
| 12w    | 3 | 132 | 131 | -4.25 [-6.56, -1.95]  | 89 | 0.0003    |
| 24w    | 4 | 310 | 309 | -4.22 [-10.11, 1.67]  | 94 | 0.16      |
| LVEF   |   |     |     |                       |    |           |
| 2w     | 3 | 134 | 134 | 6.00 [0.84, 11.17]    | 94 | 0.02      |
| 3w     | 1 | 27  | 23  | 1.40 [-1.51, 4.31]    | NA | 0.35      |
| 4w     | 7 | 445 | 442 | 5.29 [3.43, 7.16]     | 80 | < 0.00001 |
| 6w     | 5 | 193 | 183 | 5.29 [4.70, 5.88]     | 0  | < 0.00001 |
| 8w     | 5 | 170 | 168 | 5.75 [1.23, 10.27]    | 94 | 0.01      |
| 12w    | 9 | 317 | 309 | 4.90 [3.12, 6.68]     | 71 | < 0.00001 |
| 20w    | 1 | 65  | 65  | 18.43 [14.42, 22.44]  | NA | < 0.00001 |
| 24w    | 8 | 448 | 446 | 3.82 [1.55, 6.10]     | 71 | 0.001     |

Note: T, TCM group; C, Control group; SMD, standardized mean difference; NA, Not applicable; TCMSS, traditional Chinese medicine syndrome score; LVEDD, left ventricular end-diastolic diameter; LVESD, left ventricular end-systolic diameter; LVEDV, left ventricular end-diastolic volume; LVESV, left ventricular end-systolic volume; LVEDVi, left ventricular end-diastolic volume index; LVESVi, left ventricular end-systolic volume index; LVEF, left ventricular ejection fraction.
